# Supplementary material for: MetaBinner: a high-performance and stand-alone ensemble binning method to recover individual genomes from complex microbial communities
Source: Springer Nature journal article supplement (doi:10.1186/s13059-022-02832-6), 2023-01-06
Supplement: MOESM1 [file 13059_2022_2832_MOESM1_ESM.pdf]

# Supplementary Materials for “MetaBinner: a high-performance and stand-alone ensemble binning method to recover individual genomes from complex microbial communities”

Ziye Wang<sup>1,2</sup>, Pingqin Huang<sup>3</sup>, Ronghui You<sup>1</sup>, Fengzhu Sun<sup>4</sup>, and Shanfeng Zhu<sup>1,5,6,7,8✉</sup>

<sup>1</sup> The Institute of Science and Technology for Brain-inspired Intelligence, Fudan University, Shanghai, China

<sup>2</sup> School of Mathematical Sciences, Fudan University, Shanghai, China

<sup>3</sup> Shanghai Key Lab of Intelligent Information Processing, School of Computer Science, Fudan University, Shanghai, China

<sup>4</sup> Department of Quantitative and Computational Biology, University of Southern California, Los Angeles, CA 90089, USA

<sup>5</sup> Shanghai Qi Zhi Institute, Shanghai, China

<sup>6</sup> Key Laboratory of Computational Neuroscience and Brain-Inspired Intelligence (Fudan University), Ministry of Education, Shanghai, China

<sup>7</sup> MOE Frontiers Center for Brain Science, Fudan University, Shanghai, China

<sup>8</sup> Zhangjiang Fudan International Innovation Center, Shanghai, China  
zhusf@fudan.edu.cn

## A Descriptions about the ground truth annotations provided by CAMI II challenges

The ground truth annotations of contigs from the simulated datasets for AMBER are provided by the organizer of CAMI I and II challenges (<https://data.cami-challenge.org>). The simulated datasets were generated with CAMISIM (<https://github.com/CAMI-challenge/CAMISIM>). As introduced in [3,18], CAMISIM generates a BAM file for each sample of a dataset, which gives the alignment of simulated reads to reference genomes. Furthermore, it extracts the perfect co-assembly of all samples by including all regions covered by at least one read according to the BAM files. The perfect co-assembly is used for binning, named as “gold-standard cross-sample assembly” in our paper, as done in [4]. Strain-level is used for measuring the performances of tools using AMBER.

## B Brief description of k-means++

K-means++ [42] is a variant of k-means, which utilizes a smart way to initialize clustering centers to improve clustering accuracy and computational speed. K-means++ uniformly chooses a data point as the first initial center  $c_1$  at random from the set of data points,  $\mathcal{X}$ . A new center  $c_i$  is chosen from  $\mathcal{X}$  with probability  $P(x)$ , which is defined in equation (1). The process is repeated until  $K$  centers have been chosen.

$$P(x) = \frac{D(x)^2}{\sum_{x \in \mathcal{X}} D(x)^2}, \quad (1)$$

where  $D(x)$  is the shortest distance between point  $x$  and the closest previously chosen initial center.

## C Parameters used in Step 4 of MetaBinner

Step 4 is developed for generating more low-contamination bins for further integration by splitting bin with high contamination. According to the definitions for estimated completeness and contamination given in CheckM, it is possible for a bin with high contamination (>50%) and low completeness (<50%). Therefore, we also set a high completeness condition to split bins to avoid unnecessary waste of time on the bins with low completeness. We further tried different values of parameters for MetaBinner in CAMI Airways, as shown in Additional file 1: Table S4.

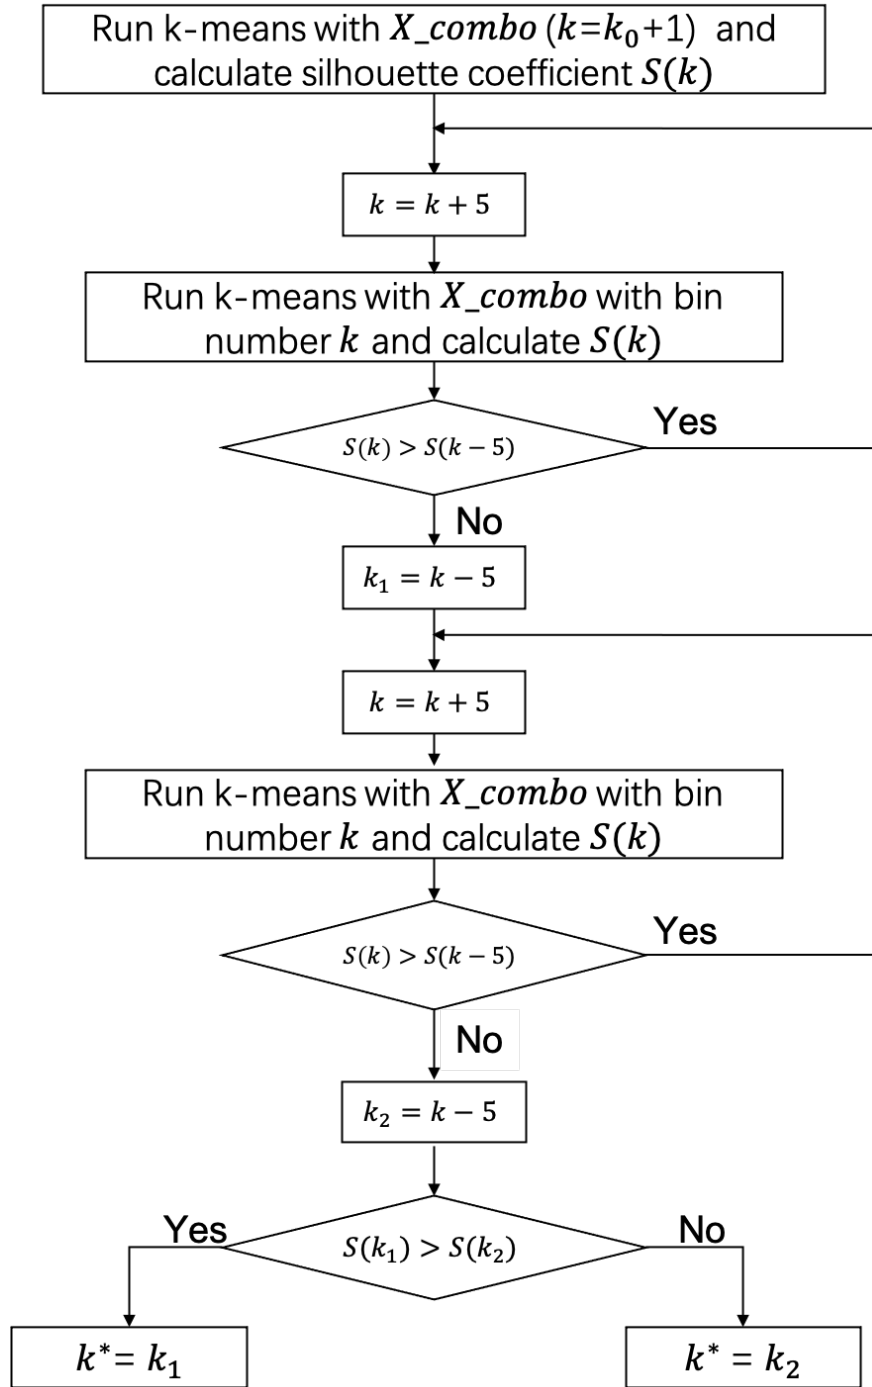

Fig. S1: The workflow of estimating the number of bins from  $k_0$ .

D Supplementary figure

E Supplementary tables

Table S1: The total number of predicted bins per binner.

| Methods    | CAMI Airways | CAMI trointestinal tract | Gas- CAMI Mouse gut | STEC (MEGAHIT assembly) | STEC (metaSPAdes assembly) |
|------------|--------------|--------------------------|---------------------|-------------------------|----------------------------|
| CONCOCT    | 202          | 155                      | 353                 | 331                     | 312                        |
| MaxBin     | 437          | 205                      | 874                 | 303                     | 283                        |
| MetaBAT    | 210          | 158                      | 597                 | 218                     | 218                        |
| VAMB       | 344          | 217                      | 641                 | 256                     | 269                        |
| BMC3C      | 1560         | 342                      | 565                 | 921                     | 800                        |
| DAS Tool   | 137          | 156                      | 556                 | 140                     | 105                        |
| MetaWRAP   | 144          | 139                      | 523                 | 155                     | 143                        |
| MetaBinner | 285          | 202                      | 641                 | 194                     | 167                        |

Table S2: Performance comparison of the bidders on the real dataset evaluated by CheckM.

| Dataset                          | Methods    | Metrics                                 |                                         |                                         |                                        |                                        |                                        |
|----------------------------------|------------|-----------------------------------------|-----------------------------------------|-----------------------------------------|----------------------------------------|----------------------------------------|----------------------------------------|
|                                  |            | #bins<br>(>50%<br>comp<br><10%<br>cont) | #bins<br>(>70%<br>comp<br><10%<br>cont) | #bins<br>(>90%<br>comp<br><10%<br>cont) | #bins<br>(>50%<br>comp<br><5%<br>cont) | #bins<br>(>70%<br>comp<br><5%<br>cont) | #bins<br>(>90%<br>comp<br><5%<br>cont) |
| STEC<br>(metaSPAdes<br>assembly) | CONCOCT    | 101                                     | 72                                      | 22                                      | 92                                     | 65                                     | 21                                     |
|                                  | MaxBin     | 102                                     | 72                                      | 28                                      | 86                                     | 61                                     | 26                                     |
|                                  | MetaBAT    | 91                                      | 53                                      | 18                                      | 87                                     | 50                                     | 18                                     |
|                                  | VAMB       | 129                                     | 81                                      | 25                                      | 127                                    | 79                                     | 25                                     |
|                                  | BMC3C      | 108                                     | 65                                      | 21                                      | 107                                    | 65                                     | 21                                     |
|                                  | DAS Tool   | 78                                      | 57                                      | 24                                      | 73                                     | 52                                     | 24                                     |
|                                  | MetaWRAP   | 143                                     | 96                                      | 31                                      | 135                                    | 92                                     | 31                                     |
|                                  | MetaBinner | <b>147</b>                              | <b>101</b>                              | <b>33</b>                               | <b>141</b>                             | <b>96</b>                              | <b>32</b>                              |

The best results among all the methods are in bold, while the best results among the individual bidders are italicized. The input binning results of MetaWRAP are generated by CONCOCT, MaxBin and MetaBAT. “#bins (>50% comp <10% cont)” denotes that the number of recovered bins that have >50% completeness and <10% contamination.

Table S3: Performance comparison of the bidders on the real dataset evaluated by AMBER (based on the contigs labeled on the species-level).

| Dataset                 | Methods    | Metrics                                 |                                         |                                         |                                        |                                        |                                        |
|-------------------------|------------|-----------------------------------------|-----------------------------------------|-----------------------------------------|----------------------------------------|----------------------------------------|----------------------------------------|
|                         |            | #bins<br>(>50%<br>comp<br><10%<br>cont) | #bins<br>(>70%<br>comp<br><10%<br>cont) | #bins<br>(>90%<br>comp<br><10%<br>cont) | #bins<br>(>50%<br>comp<br><5%<br>cont) | #bins<br>(>70%<br>comp<br><5%<br>cont) | #bins<br>(>90%<br>comp<br><5%<br>cont) |
| STEC (MEGAHIT assembly) | CONCOCT    | 51                                      | 45                                      | 18                                      | 46                                     | 41                                     | 17                                     |
|                         | MaxBin     | 47                                      | 40                                      | 24                                      | 37                                     | 31                                     | 19                                     |
|                         | MetaBAT    | 47                                      | 24                                      | 6                                       | 44                                     | 22                                     | 5                                      |
|                         | VAMB       | 57                                      | <b>47</b>                               | 20                                      | 50                                     | <b>42</b>                              | 19                                     |
|                         | BMC3C      | <b>61</b>                               | 43                                      | 21                                      | <b>54</b>                              | 39                                     | 18                                     |
|                         | DAS Tool   | 37                                      | 32                                      | 14                                      | 31                                     | 28                                     | 12                                     |
|                         | MetaWRAP   | 53                                      | 39                                      | 11                                      | 49                                     | 36                                     | 10                                     |
|                         | MetaBinner | 50                                      | 44                                      | <b>25</b>                               | 46                                     | 41                                     | <b>24</b>                              |

The best results among all the methods are in bold. The input binning results of MetaWRAP and DAS Tool are generated by CONCOCT, MaxBin and MetaBAT. “#bins (>50% comp <10% cont)” denotes that the number of recovered bins that have >50% completeness and <10% contamination.

Table S4: Performance comparison of the binner on the CAMI Airways dataset evaluated by AMBER.

| Dataset      | Methods                                           | Metrics                                 |                                         |                                         |                                        |                                        |                                        |
|--------------|---------------------------------------------------|-----------------------------------------|-----------------------------------------|-----------------------------------------|----------------------------------------|----------------------------------------|----------------------------------------|
|              |                                                   | #bins<br>(>50%<br>comp<br><10%<br>cont) | #bins<br>(>70%<br>comp<br><10%<br>cont) | #bins<br>(>90%<br>comp<br><10%<br>cont) | #bins<br>(>50%<br>comp<br><5%<br>cont) | #bins<br>(>70%<br>comp<br><5%<br>cont) | #bins<br>(>90%<br>comp<br><5%<br>cont) |
| CAMI Airways | MetaBinner (post_process: min-comp_50_mincont_10) | 217                                     | 196                                     | 140                                     | 186                                    | 172                                    | 125                                    |
|              | MetaBinner (post_process: min-comp_50_mincont_30) | 215                                     | 191                                     | 142                                     | 186                                    | 169                                    | 127                                    |
|              | MetaBinner (post_process: min-comp_50_mincont_50) | 215                                     | 191                                     | 144                                     | 186                                    | 169                                    | 129                                    |
|              | MetaBinner (post_process: min-comp_70_mincont_10) | 217                                     | 196                                     | 140                                     | 186                                    | 172                                    | 125                                    |
|              | MetaBinner (post_process: min-comp_70_mincont_30) | 215                                     | 191                                     | 142                                     | 186                                    | 169                                    | 127                                    |
|              | MetaBinner (post_process: min-comp_70_mincont_50) | 215                                     | 191                                     | 144                                     | 186                                    | 169                                    | 129                                    |
|              |                                                   |                                         |                                         |                                         |                                        |                                        |                                        |
|              |                                                   |                                         |                                         |                                         |                                        |                                        |                                        |

“#bins (>50% comp <10% cont)” denotes the number of recovered bins that have >50% completeness and <10% contamination. “mincomp\_a.mincont\_b” denotes that we split bins with the contamination ( $\geq b\%$ ) and completeness ( $\geq a\%$ ) in Step 4.

## F Protocols of the compared methods

### F.1 Commands for Binning:

#### **CONCOCT, MaxBin and MetaBAT:**

```
metawrap binning -o path_to_outdir/INITIAL_BINNING -t 40 -a contig_file --  
interleaved --universal --metabat2 --maxbin2 --concoct path_to_reads/*fastq
```

#### **METAWRAP:**

```
metawrap bin_refinement -o path_to_outdir/metawrap -t 40 -A  
path_to_outdir/INITIAL_BINNING/metabat2_bins/ -B  
path_to_outdir/INITIAL_BINNING/maxbin2_bins/ -C  
path_to_outdir/INITIAL_BINNING/concoct_bins/ -c 50 -x 10
```

#### **DAS tool:**

```
DAS_Tool -i path_to_outdir/metawrap/concoct_bins.contigs,  
path_to_outdir/metawrap/maxbin2_bins.contigs,  
path_to_outdir/metawrap/metabat2_bins.contigs -l concoct,maxbin,metabat -c  
contig_file -o path_to_outdir/das_tool --threads 40 (--search_engine diamond)
```

\*It is necessary to add the parameter “--search\_engine diamond” for running DAS tool on the CAMI mouse gut dataset.

#### **VAMB:**

```
vamb --outdir path_to_outdir/vamb --fasta contig_file --jgi  
path_to_outdir/INITIAL_BINNING/work_files/metabat_depth.txt --minfasta 200000
```

#### **MetaBinner:**

##### **Generate k-mer profiles:**

```
python path_to_metabinner/scripts/gen_kmer.py contig_file 1000 4
```

##### **Generate coverage profiles:**

```
cat path_to_outdir/INITIAL_BINNING/work_files/mb2_master_depth.txt | cut -f -  
1,4 > coverage_profile.tsv
```

```
bash run_metabinner.sh -a contig_file -o output_dir -d coverage_profile.tsv -k  
kmer_profile -p metabinner_path
```

#### **BMC3C:**

We ran BMC3C according to the commands given in the link provided by its authors:

[http://mlda.swu.edu.cn/upload/code/BMC3C\\_README.txt](http://mlda.swu.edu.cn/upload/code/BMC3C_README.txt)

## **F.2 Commands for the assembly of the STEC dataset:**

```
cat path_to_fq_files/ERR*_1.fastq > path_to_fq_files/ALL_READS_1.fastq  
cat path_to_fq_files/ERR*_2.fastq > path_to_fq_files/ALL_READS_2.fastq
```

### **MetaSPAdes:**

```
metawrap assembly --metaspades -1 path_to_fq_files/ALL_READS_1.fastq -2  
path_to_fq_files/ALL_READS_2.fastq -m 900 -t 45 -o  
path_to_outdir/ASSEMBLY_metaspades
```

### **MEGAHIT:**

```
metawrap assembly -1 path_to_fq_files/ALL_READS_1.fastq -2  
path_to_fq_files/ALL_READS_2.fastq -m 900 -t 45 -o  
path_to_outdir/ASSEMBLY_megahit
```
